# Supplementary material for: Sargassum natans I Algae: An Alternative for a Greener Approach for the Synthesis of ZnO Nanostructures with Biological and Environmental Applications
Source: MDPI journal article supplement (doi:10.3390/md21050297), 2023-05-13
Supplement: s1 [file s1]

## Supplementary Materials:

# *Sargassum natans* I algae: An Alternative for a Greener Approach for the Synthesis of ZnO Nanostructures with Biological and Environmental Applications

Jose Luis López-Miranda <sup>1</sup>, Fabian Mares-Briones <sup>1</sup>, Gustavo A. Molina <sup>1</sup>, M. A. González-Reyna <sup>1</sup>, Isaac Velázquez-Hernández <sup>1</sup>, Beatriz Liliana España-Sánchez <sup>2</sup>, Rodolfo Silva <sup>3</sup>, Rodrigo Esparza <sup>1</sup> and Miriam Estévez <sup>1,\*</sup>

<sup>1</sup> Centro de Física Aplicada y Tecnología Avanzada, Universidad Nacional Autónoma de México, Boulevard Juriquilla 3001, Querétaro 76230, Mexico; lopezfim@gmail.com (J.L.L.-M.); fabianmares@gmail.com (F.M.-B.); gamol@fata.unam.mx (G.A.M.); marlengonzalez@fata.unam.mx (M.A.G.-R.); isaacvh\_qi@hotmail.com (I.V.-H.); resparza@fata.unam.mx (R.E.)

<sup>2</sup> CONACYT\_Centro de Investigación y Desarrollo Tecnológico en Electroquímica SC, Parque Tecnológico Querétaro s/n Sanfandila, Pedro Escobedo 76703, Mexico; lespana@cideteq.mx

<sup>3</sup> Instituto de Ingeniería, Universidad Nacional Autónoma de México, Edificio 17, Ciudad Universitaria, Coyoacán, Mexico City 04510, Mexico; rsilvac@iingen.unam.mx

\* Correspondence: miries@fata.unam.mx

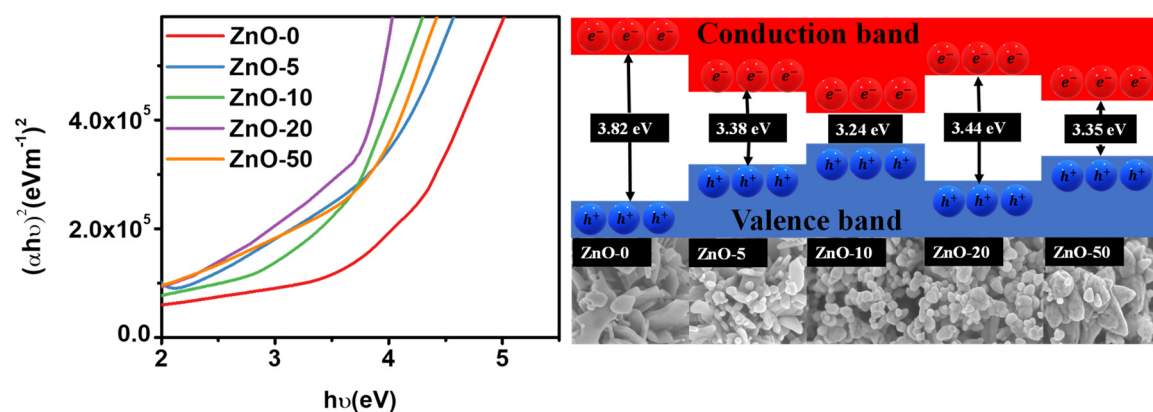

**Figure S1.** Determination of band gap obtained from the UV-Vis spectra using the Tauc equation.

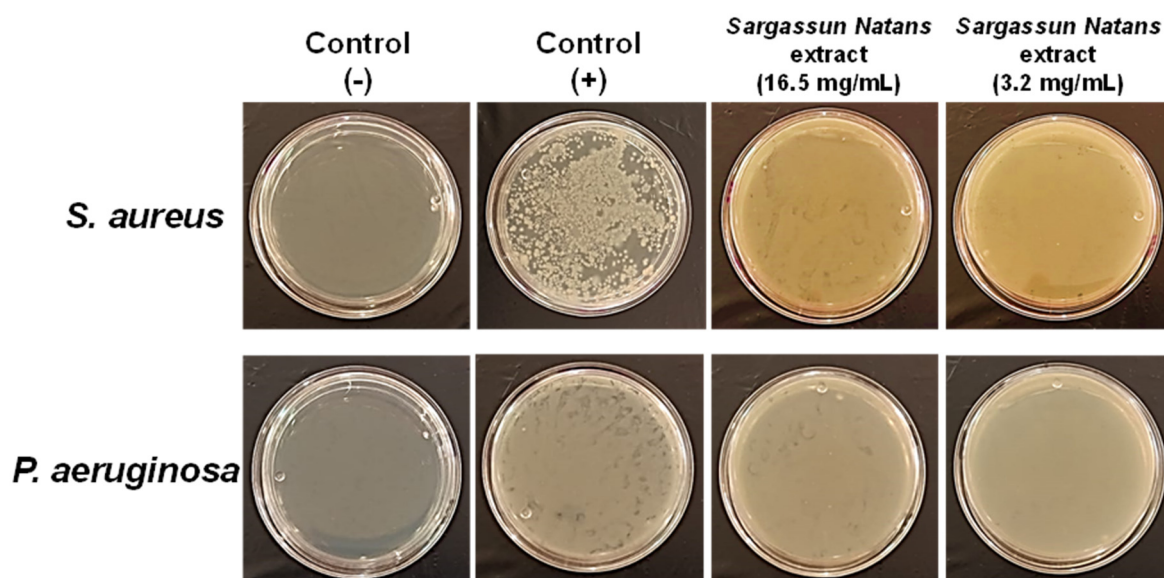

**Figure S2.** Antibacterial activity of *Sargassum natans I* alga extract by microdilution method after 3 h of contact against *S. aureus* and *P. aeruginosa*.

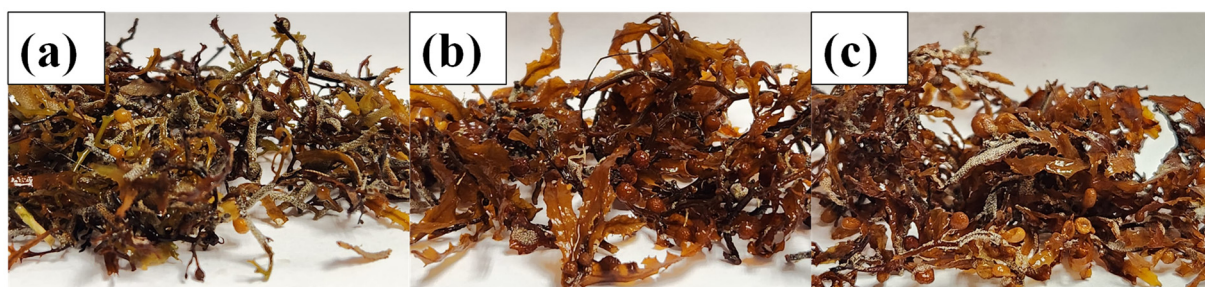

**Figure S3.** Different species of *Sargassum* algae that arrive in the Caribbean: (a) *natans I*, (b) *natans VIII*, and (c) *Fluitans III*.

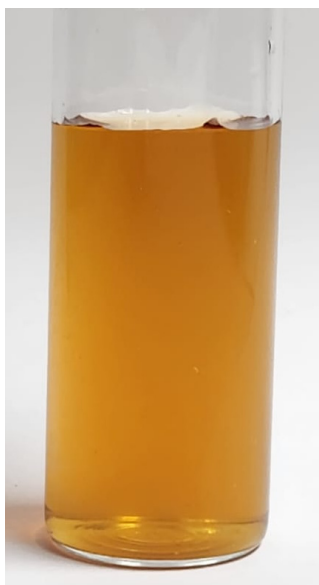

**Figure S4.** Typical image of the *Sargassum natans I* alga extract.
